# Supplementary material
Source: PubMed Central journal article supplement (PMC3276135)
Supplement: supp_1.3.183_TableS1.pdf [file supp_1.3.183_TableS1.pdf]

TABLE S1

## List of synonymous base-substitutions in the sequenced genomes

| Population | Clone Label | Clone Name | Generation | Genome Size [bp] | Synonymous Sites [bp] | Synonymous Mutations | dN/dS <sup>a</sup> | Genome Position <sup>b</sup>                                             | Gene Name                                                                                   | Base Change                            | Average Coverage [per bp] | Sequencing Facility <sup>c</sup> |
|------------|-------------|------------|------------|------------------|-----------------------|----------------------|--------------------|--------------------------------------------------------------------------|---------------------------------------------------------------------------------------------|----------------------------------------|---------------------------|----------------------------------|
| Ancestor   | -           | REL606     | 0          | 4,629,812        | 941,021               | -                    | -                  | -                                                                        | -                                                                                           | -                                      | -                         | KRIBB <sup>d</sup>               |
| Ara-1      | 20K-A       | REL8593A   | 20,000     | 4,485,227        | 919,303               | 0                    | Inf.               | -                                                                        | -                                                                                           | -                                      | 56.1                      | KRIBB <sup>e</sup>               |
| Ara-1      | 20K-B       | REL8593B   | 20,000     | 4,483,083        | 918,965               | 0                    | Inf.               | -                                                                        | -                                                                                           | -                                      | 36.3                      | Genoscope                        |
| Ara-1      | 20K-C       | REL8593C   | 20,000     | 4,484,924        | 919,293               | 0                    | Inf.               | -                                                                        | -                                                                                           | -                                      | 44.9                      | Genoscope                        |
| Ara-3      | 30K-A       | ZDB16      | 30,000     | 4,490,751        | 921,314               | 2                    | 2.62               | 4,111,342<br>4,177,963                                                   | <i>metL</i><br><i>hemE</i>                                                                  | C→T<br>T→G                             | 107.0                     | MSU                              |
| Ara-3      | 30K-B       | ZDB357     | 30,000     | 4,464,009        | 915,982               | 4                    | 1.61               | 756,799<br>2,613,609<br>2,642,843<br>4,107,018                           | <i>tolR</i><br><i>purL</i><br><i>yfiQ</i><br><i>ECB_03822</i>                               | C→T<br>G→A<br>G→T<br>T→A               | 101.7                     | MSU                              |
| Ara-3      | 40K         | REL10988   | 40,000     | 4,425,016        | 908,843               | 6                    | 1.43               | 756,799<br>2,983,794<br>3,141,566<br>3,407,922<br>4,107,018<br>4,313,510 | <i>tolR</i><br><i>yggW</i><br><i>yggE</i><br><i>kefB</i><br><i>ECB_03822</i><br><i>eptA</i> | C→T<br>C→T<br>C→T<br>C→A<br>T→A<br>C→T | 31.3                      | MSU                              |
| Ara-5      | 40K-A       | REL10947   | 40,000     | 4,458,388        | 914,306               | 2                    | 2.01               | 307,594<br>3,107,610                                                     | <i>yahC</i><br><i>ygiN</i>                                                                  | C→T<br>T→A                             | 61.2                      | MSU                              |
| Ara-5      | 40K-B       | REL10948   | 40,000     | 4,458,503        | 914,442               | 3                    | 1.41               | 157,626                                                                  | <i>htrE</i>                                                                                 | A→T                                    | 205.6                     | MSU                              |

|       |       |          |        |           |         |   |       |           |             |     |       |           |
|-------|-------|----------|--------|-----------|---------|---|-------|-----------|-------------|-----|-------|-----------|
|       |       |          |        |           |         |   |       | 307,594   | <i>yahC</i> | C→T |       |           |
|       |       |          |        |           |         |   |       | 3,107,610 | <i>ygiN</i> | T→A |       |           |
| Ara-5 | 40K-C | REL10949 | 40,000 | 4,459,592 | 914,639 | 2 | 2.09  | 307,594   | <i>yahC</i> | C→T | 222.1 | MSU       |
|       |       |          |        |           |         |   |       | 3,107,610 | <i>ygiN</i> | T→A |       |           |
| Ara-6 | 40K-A | REL11005 | 40,000 | 4,426,313 | 908,744 | 2 | 3.91  | 2,087,738 | <i>mdtA</i> | C→A | 97.9  | Genoscope |
|       |       |          |        |           |         |   |       | 2,095,621 | <i>mdtD</i> | G(A |       |           |
| Ara-6 | 40K-B | REL11006 | 40,000 | 4,471,467 | 916,444 | 4 | 2.01  | 857,058   | <i>moeB</i> | C→T | 121.4 | Genoscope |
|       |       |          |        |           |         |   |       | 1,352,030 | <i>sapC</i> | G→T |       |           |
|       |       |          |        |           |         |   |       | 2,087,738 | <i>mdtA</i> | C→A |       |           |
|       |       |          |        |           |         |   |       | 3,482,212 | <i>malT</i> | G→A |       |           |
| Ara+1 | 40K-A | REL11008 | 40,000 | 4,361,096 | 894,621 | 5 | 1.07  | 132,062   | <i>lpd</i>  | C→T | 38.6  | Genoscope |
|       |       |          |        |           |         |   |       | 3,124,208 | <i>yqil</i> | G→A |       |           |
|       |       |          |        |           |         |   |       | 3,308,106 | <i>yhcB</i> | G→A |       |           |
|       |       |          |        |           |         |   |       | 3,409,316 | <i>yheS</i> | T→G |       |           |
|       |       |          |        |           |         |   |       | 4,133,104 | <i>ppc</i>  | G→A |       |           |
| Ara+1 | 40K-B | REL11009 | 40,000 | 4,386,876 | 900,352 | 6 | 0.828 | 239,002   | <i>dnaQ</i> | A→C | 42.9  | Genoscope |
|       |       |          |        |           |         |   |       | 3,308,106 | <i>yhcB</i> | G→A |       |           |
|       |       |          |        |           |         |   |       | 3,409,316 | <i>yheS</i> | T→G |       |           |
|       |       |          |        |           |         |   |       | 3,527,027 | <i>livH</i> | C→A |       |           |
|       |       |          |        |           |         |   |       | 3,910,606 | <i>yifB</i> | T→G |       |           |
|       |       |          |        |           |         |   |       | 4,133,104 | <i>ppc</i>  | G→A |       |           |
| Ara+2 | 40K-A | REL10950 | 40,000 | 4,430,963 | 910,384 | 1 | 3.39  | 1,083,668 | <i>wrbA</i> | C→T | 89.2  | Genoscope |
| Ara+2 | 40K-B | REL10951 | 40,000 | 4,429,691 | 910,170 | 0 | Inf.  | -         | -           | -   | 86.8  | Genoscope |
| Ara+4 | 40K-A | REL10956 | 40,000 | 4,441,213 | 910,966 | 3 | 1.57  | 420,328   | <i>cyoB</i> | A(C | 88.0  | Genoscope |
|       |       |          |        |           |         |   |       | 2,772,320 | <i>iap</i>  | A(C |       |           |

|       |       |          |        |           |         |   |      |           |                  |      |      |           |
|-------|-------|----------|--------|-----------|---------|---|------|-----------|------------------|------|------|-----------|
|       |       |          |        |           |         |   |      | 3,061,109 | <i>ECB_02854</i> | G(A) |      |           |
| Ara+4 | 40K-B | REL10957 | 40,000 | 4,441,020 | 910,968 | 2 | 1.99 | 420,328   | <i>cyoB</i>      | A(C) | 95.2 | Genoscope |
|       |       |          |        |           |         |   |      | 2,772,320 | <i>iap</i>       | A(C) |      |           |
| Ara+5 | 40K-A | REL10982 | 40,000 | 4,443,137 | 910,621 | 5 | 1.89 | 122,591   | <i>ampE</i>      | T→A  | 57.4 | Genoscope |
|       |       |          |        |           |         |   |      | 212,865   | <i>ldcC</i>      | T→C  |      |           |
|       |       |          |        |           |         |   |      | 1,317,194 | <i>trpC</i>      | G→A  |      |           |
|       |       |          |        |           |         |   |      | 2,009,188 | <i>yoeF</i>      | G→T  |      |           |
|       |       |          |        |           |         |   |      | 2,251,393 | <i>napA</i>      | G→A  |      |           |
| Ara+5 | 40K-B | REL10983 | 40,000 | 4,443,794 | 910,724 | 5 | 1.83 | 122,591   | <i>ampE</i>      | T→A  | 66.5 | Genoscope |
|       |       |          |        |           |         |   |      | 212,865   | <i>ldcC</i>      | T→C  |      |           |
|       |       |          |        |           |         |   |      | 1,317,194 | <i>trpC</i>      | G→A  |      |           |
|       |       |          |        |           |         |   |      | 2,009,188 | <i>yoeF</i>      | G→T  |      |           |
|       |       |          |        |           |         |   |      | 2,251,393 | <i>napA</i>      | G→A  |      |           |

<sup>a</sup>Inf., indicates an infinite ratio between dN and dS because the denominator was zero.

<sup>b</sup>Genome position of synonymous substitutions relative to the ancestral strain, REL606 [GenBank:NC\_012967.1].

<sup>c</sup>Facilities are KRIBB, Korea Research Institute of Bioscience and Biotechnology, Daejeon, ROK; MSU, Michigan State University, East Lansing, MI, USA; and Genoscope, Évry, FRA.

<sup>d</sup>Jeong, H., V. Barbe, C. H. Lee, D. Vallenet, D. S. Yu *et al.*, 2009 Genome sequences of *Escherichia coli* B strains REL606 and BL21(DE3). *J. Mol. Biol.* **394**: 644–652.

<sup>e</sup>Barrick, J. E., D. S. Yu, S. H. Yoon, H. Jeong, T. K. Oh *et al.*, 2009 Genome evolution and adaptation in a long-term experiment with *Escherichia coli*. *Nature* **461**: 1243–1247.
